# Supplementary material
Source: publisher figshare collection journal article supplement (https://sage.figshare.com/ndownloader/files/15254516)
Supplement: Supplementary file 1 [file 15254516]

**Bimanual CIRCUIT**

|  | **time** | **time × stimulation order** | **time × paretic UL’s direction order** | **time × stim. order × paretic UL direction order** |
| --- | --- | --- | --- | --- |
| **Bi-SAT** | (t17df= 0.33; p=0.74) | (t17df= 0.87; p=0.39) | (t17df= 0.71; p=0.49) | (t17df= -1.15; p=0.27) |
| **Bi-Co** | (t17df= -0.92; p=0.37) | (t17df= -0.43; p=0.67) | (t17df= -1.17; p=0.26) | (t17df= 0.50; p=0.63) |

**Supplementary Table 1.** No carry-over effect was detected by GLMM for the stimulation type, order of paretic UL’s direction or their interaction.
